# Supplementary material for: A comparative study of CunX (X = Sc, Y; n = 1–10) clusters based on the structures, and electronic and aromatic properties
Source: Royal Society of Chemistry journal article supplement (doi:10.1039/c9nj00236g), 2019-01-01
Supplement: c9nj00236g1.pdf [file c9nj00236g1.pdf]

## Electronic Supporting Information

### **A comparative study of $\text{Cu}_n\text{X}$ ( $\text{X}=\text{Sc}, \text{Y}; n=1-10$ ) clusters based on structures, electronic and aromatic properties**

Cheng-Gang Li<sup>a, b</sup>, Zi-Gang Shen<sup>a\*</sup>, Jie Zhang<sup>a</sup>, Jin-Hai Gao<sup>a</sup>, Jing-Jie Li<sup>a</sup>, Tong Sun<sup>a</sup>, Ru-Jie Zhang<sup>a</sup>, Bao-Zeng Ren<sup>b</sup>, Yan-Fei Hu<sup>c, d</sup>

<sup>a</sup> *College of Physics and Electronic Engineering, Quantum Materials Research Center, Zhengzhou Normal University, Zhengzhou 450044, China*

<sup>b</sup> *School of Chemical Engineering and Energy, Zhengzhou University, Zhengzhou 450001, China*

<sup>c</sup> *School of Physics and Electronic Engineering, Sichuan University of Science & Engineering, Zigong 643000, China*

<sup>d</sup> *National Key Laboratory for Shock Wave and Detonation Physics Research, Institute of Fluid Physics, China Academy of Engineering Physics, Mianyang 621999, China*

\*Correspondence to: Zi-Gang Shen, College of Physics and Electronic Engineering, Quantum Materials Research Center, Zhengzhou Normal University, Zhengzhou 450044, China

Cartesian cordialities for the lowest-energy structures and low-lying isomers are listed in the paper.

CuSc Cluster

|    |            |            |             |
|----|------------|------------|-------------|
| Cu | 0.00000000 | 0.00000000 | 1.07655600  |
| Sc | 0.00000000 | 0.00000000 | -1.48667300 |

Cu<sub>2</sub>Sc Cluster

|    |            |             |             |
|----|------------|-------------|-------------|
| Cu | 0.00000000 | 2.58438300  | -0.00009900 |
| Cu | 0.00000000 | -2.58438300 | -0.00009900 |
| Sc | 0.00000000 | 0.00000000  | 0.00027300  |

Cu<sub>3</sub>Sc Cluster

|    |            |             |             |
|----|------------|-------------|-------------|
| Cu | 0.00000000 | 0.00000000  | 1.11478700  |
| Cu | 0.00000000 | 2.14581100  | 0.01490300  |
| Cu | 0.00000000 | -2.14581100 | 0.01490300  |
| Sc | 0.00000000 | 0.00000000  | -1.58062800 |

Cu<sub>4</sub>Sc Cluster

|    |             |             |             |
|----|-------------|-------------|-------------|
| Cu | -0.06109000 | 1.27363200  | 1.20819100  |
| Cu | -0.06109000 | -0.90299900 | -2.55185600 |
| Cu | -0.06109000 | -0.90299900 | 2.55185600  |
| Cu | -0.06109000 | 1.27363200  | -1.20819100 |
| Sc | 0.33745000  | -1.02365300 | 0.00000000  |

Cu<sub>5</sub>Sc Cluster

|    |             |             |             |
|----|-------------|-------------|-------------|
| Cu | 0.03910900  | -0.95513100 | 2.11405600  |
| Cu | 0.03910900  | -0.95513100 | -2.11405600 |
| Cu | 0.03910900  | 1.38447100  | 1.19303000  |
| Cu | 0.03910900  | 1.38447100  | -1.19303000 |
| Cu | -1.21892500 | -0.49315700 | 0.00000000  |
| Sc | 1.46724900  | -0.50476900 | 0.00000000  |

Cu<sub>6</sub>Sc Cluster

|    |             |             |             |
|----|-------------|-------------|-------------|
| Cu | 2.45881700  | -0.02568700 | 0.49136900  |
| Cu | -1.28474300 | 2.07632100  | 0.49563000  |
| Cu | -1.33602500 | 0.01477300  | -0.96859100 |
| Cu | 0.73512200  | -1.27110300 | -0.79990500 |
| Cu | 0.76330100  | 1.25189300  | -0.80339000 |

|    |             |             |            |
|----|-------------|-------------|------------|
| Cu | -1.33391700 | -2.04606500 | 0.49507700 |
| Sc | -0.00352800 | -0.00018300 | 1.50497700 |

Cu<sub>7</sub>Sc Cluster

|    |             |             |             |
|----|-------------|-------------|-------------|
| Cu | 0.00000000  | 2.75394747  | -0.00000000 |
| Cu | 2.15312283  | 1.71705816  | -0.00000000 |
| Cu | 2.68490026  | -0.61281097 | -0.00000000 |
| Cu | -1.19489302 | -2.48122093 | -0.00000000 |
| Cu | -2.68490026 | -0.61281096 | -0.00000000 |
| Cu | -2.15312283 | 1.71705816  | -0.00000000 |
| Cu | 1.19489302  | -2.48122093 | -0.00000000 |
| Sc | -0.00000000 | -0.00000000 | -0.00000000 |

Cu<sub>8</sub>Sc Cluster

|    |             |             |             |
|----|-------------|-------------|-------------|
| Cu | -2.22473800 | 1.35454000  | 0.58098100  |
| Cu | -2.22473800 | -1.35454000 | 0.58098100  |
| Cu | 0.00000000  | 2.10155000  | -0.33859800 |
| Cu | -1.22362200 | 0.00000000  | -1.26614100 |
| Cu | 2.22473800  | 1.35454000  | 0.58098100  |
| Cu | 1.22362200  | 0.00000000  | -1.26614100 |
| Cu | 0.00000000  | -2.10155000 | -0.33859800 |
| Cu | 2.22473800  | -1.35454000 | 0.58098100  |
| Sc | 0.00000000  | 0.00000000  | 1.22290600  |

Cu<sub>9</sub>Sc Cluster

|    |             |             |             |
|----|-------------|-------------|-------------|
| Cu | -2.31400100 | 1.33598900  | 0.84088100  |
| Cu | 0.00000000  | 2.46578300  | 0.16329800  |
| Cu | 2.31400100  | 1.33598900  | 0.84088100  |
| Cu | -2.13543000 | -1.23289100 | 0.16329800  |
| Cu | 0.00000000  | -1.44343300 | -1.26670200 |
| Cu | 1.25004900  | 0.72171600  | -1.26670200 |
| Cu | 2.13543000  | -1.23289100 | 0.16329800  |
| Cu | 0.00000000  | -2.67197800 | 0.84088100  |
| Cu | -1.25004900 | 0.72171600  | -1.26670200 |
| Sc | 0.00000000  | 0.00000000  | 1.08759700  |

Cu<sub>10</sub>Sc Cluster

|    |             |             |             |
|----|-------------|-------------|-------------|
| Cu | -0.59436200 | -1.28756500 | 1.45456900  |
| Cu | 1.40518100  | -1.48247700 | 0.00000000  |
| Cu | -0.59436200 | -1.28756500 | -1.45456900 |

|    |             |            |             |
|----|-------------|------------|-------------|
| Cu | -2.48243900 | 0.39295500 | -1.21113900 |
| Cu | -2.48243900 | 0.39295500 | 1.21113900  |
| Cu | -0.59436200 | 0.99582300 | 2.68917500  |
| Cu | 1.57103100  | 0.03625200 | 2.07028000  |
| Cu | 2.81206600  | 0.58207500 | 0.00000000  |
| Cu | 1.57103100  | 0.03625200 | -2.07028000 |
| Cu | -0.59436200 | 0.99582300 | -2.68917500 |
| Sc | -0.02345500 | 0.86374400 | 0.00000000  |

CuY Cluster

|    |            |            |             |
|----|------------|------------|-------------|
| Cu | 0.00000000 | 0.00000000 | -1.54915200 |
| Y  | 0.00000000 | 0.00000000 | 1.15193400  |

Cu<sub>2</sub>Y Cluster

|    |             |             |            |
|----|-------------|-------------|------------|
| Cu | 2.44209100  | -0.47513800 | 0.00000000 |
| Cu | -2.44209100 | -0.47524100 | 0.00000000 |
| Y  | 0.00000000  | 0.70669200  | 0.00000000 |

Cu<sub>3</sub>Y Cluster

|    |             |             |            |
|----|-------------|-------------|------------|
| Cu | 0.00000000  | 2.70323700  | 0.00000000 |
| Cu | 2.34107200  | -1.35161800 | 0.00000000 |
| Cu | -2.34107200 | -1.35161800 | 0.00000000 |
| Y  | 0.00000000  | 0.00000000  | 0.00000000 |

Cu<sub>4</sub>Y Cluster

|    |            |             |             |
|----|------------|-------------|-------------|
| Cu | 0.00000000 | 2.73977000  | 0.51914500  |
| Cu | 0.00000000 | 1.18580500  | -1.36251300 |
| Cu | 0.00000000 | -1.18580500 | -1.36251300 |
| Cu | 0.00000000 | -2.73977000 | 0.51914500  |
| Y  | 0.00000000 | 0.00000000  | 1.25423800  |

Cu<sub>5</sub>Y Cluster

|    |             |             |             |
|----|-------------|-------------|-------------|
| Cu | 0.00000000  | 1.79999400  | -0.17906700 |
| Cu | 0.00000000  | -1.79999400 | -0.17906700 |
| Cu | -1.79999400 | 0.00000000  | -0.17906700 |
| Cu | 0.00000000  | 0.00000000  | -1.89661100 |
| Cu | 1.79999400  | 0.00000000  | -0.17906700 |
| Y  | 0.00000000  | 0.00000000  | 1.94291000  |

Cu<sub>6</sub>Y Cluster

|    |             |             |             |
|----|-------------|-------------|-------------|
| Cu | -0.41686600 | -1.32490100 | 2.09287700  |
| Cu | 1.48911000  | 2.02707800  | 0.00000000  |
| Cu | -1.63360600 | -0.56695700 | 0.00000000  |
| Cu | -0.41686600 | 1.12359300  | 1.28953600  |
| Cu | -0.41686600 | -1.32490100 | -2.09287700 |
| Cu | -0.41686600 | 1.12359300  | -1.28953600 |
| Y  | 1.34735500  | -0.78634900 | 0.00000000  |

Cu<sub>7</sub>Y Cluster

|    |             |             |            |
|----|-------------|-------------|------------|
| Cu | 0.00000000  | 2.83874000  | 0.00000000 |
| Cu | 2.21941600  | 1.76992500  | 0.00000000 |
| Cu | 1.23168300  | -2.55761600 | 0.00000000 |
| Cu | -2.21941600 | 1.76992500  | 0.00000000 |
| Cu | -1.23168300 | -2.55761600 | 0.00000000 |
| Cu | -2.76756700 | -0.63167900 | 0.00000000 |
| Cu | 2.76756700  | -0.63167900 | 0.00000000 |
| Y  | 0.00000000  | 0.00000000  | 0.00000000 |

Cu<sub>8</sub>Y Cluster

|    |             |             |             |
|----|-------------|-------------|-------------|
| Cu | -1.38517000 | 2.27588300  | 0.42751700  |
| Cu | 0.00000000  | 1.22713400  | -1.34837100 |
| Cu | -2.09728300 | 0.00000000  | -0.44650300 |
| Cu | 2.09728300  | 0.00000000  | -0.44650300 |
| Cu | -1.38517000 | -2.27588300 | 0.42751700  |
| Cu | 1.38517000  | -2.27588300 | 0.42751700  |
| Cu | 0.00000000  | -1.22713400 | -1.34837100 |
| Cu | 1.38517000  | 2.27588300  | 0.42751700  |
| Y  | 0.00000000  | 0.00000000  | 1.39771100  |

Cu<sub>9</sub>Y Cluster

|    |             |             |             |
|----|-------------|-------------|-------------|
| Cu | -1.24893800 | 0.72107400  | -1.32817100 |
| Cu | 0.00000000  | 2.49905300  | 0.03702800  |
| Cu | -2.16424300 | -1.24952600 | 0.03702800  |
| Cu | 2.16424300  | -1.24952600 | 0.03702800  |
| Cu | 1.24893800  | 0.72107400  | -1.32817100 |
| Cu | -2.39156600 | 1.38077100  | 0.71417900  |
| Cu | 0.00000000  | -1.44214900 | -1.32817100 |
| Cu | 2.39156600  | 1.38077100  | 0.71417900  |
| Cu | 0.00000000  | -2.76154200 | 0.71417900  |

|   |            |            |            |
|---|------------|------------|------------|
| Y | 0.00000000 | 0.00000000 | 1.28707200 |
|---|------------|------------|------------|

Cu<sub>10</sub>Y Cluster

|    |             |             |             |
|----|-------------|-------------|-------------|
| Cu | -2.02856400 | 0.42841400  | 0.00000000  |
| Cu | -0.83988800 | -1.19478500 | 1.42507400  |
| Cu | 1.54790300  | -2.00274200 | -1.23358900 |
| Cu | -0.83988800 | -1.19478500 | -1.42507400 |
| Cu | 1.54790300  | -2.00274200 | 1.23358900  |
| Cu | -0.83988800 | 1.34768700  | 2.10848500  |
| Cu | 1.06289000  | -0.09705400 | -2.80110500 |
| Cu | -0.83988800 | 1.34768700  | -2.10848500 |
| Cu | 1.06289000  | -0.09705400 | 2.80110500  |
| Cu | -1.08107000 | 2.72579400  | 0.00000000  |
| Y  | 0.92770100  | 0.54994500  | 0.00000000  |

**Table S1.** Basis set effects on the polarizability ( $a_{xx}, a_{yy}, a_{zz}, \bar{a}$ ) of CuSc and CuY clusters at the B3LYP/MP2 level of theory.

| Cluster | Basis set   | Functional | $a_{xx}$ (a.u.) | $a_{yy}$ (a.u.) | $a_{zz}$ (a.u.) | $\bar{a}$ (a.u.) |
|---------|-------------|------------|-----------------|-----------------|-----------------|------------------|
| CuSc    | Aug-cc-pvtz | B3LYP      | 146.49          | 122.19          | 195.08          | 154.59           |
|         |             | MP2        | 164.28          | 183.67          | 212.03          | 186.66           |
|         | Lanl2dz     | B3LYP      | 155.84          | 121.84          | 199.21          | 158.96           |
|         |             | MP2        | 165.31          | 183.29          | 241.86          | 196.82           |
|         | 6-311+G(d)  | B3LYP      | 145.78          | 121.32          | 196.67          | 154.59           |
|         |             | MP2        | 161.74          | 150.54          | 223.91          | 178.73           |
| CuY     | cc-pvtz-pp  | B3LYP      | 167.19          | 167.19          | 191.20          | 175.19           |
|         |             | MP2        | 179.77          | 179.77          | 221.63          | 193.72           |
|         | Lanl2dz     | B3LYP      | 177.53          | 177.53          | 192.12          | 182.39           |
|         |             | MP2        | 190.84          | 190.84          | 220.89          | 200.86           |
|         | Aug-cc-pvtz | B3LYP      | 160.62          | 160.62          | 187.91          | 169.71           |
|         |             | MP2        | 176.51          | 176.51          | 217.35          | 190.12           |
|         | Def2-QZVP   | B3LYP      | 159.62          | 159.62          | 187.39          | 168.86           |
|         |             | MP2        | 175.69          | 175.69          | 210.79          | 187.39           |

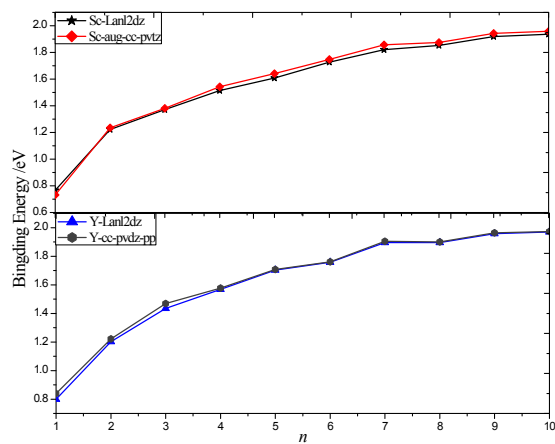

**Figure S1.** Binding energy (BE) of the  $\text{Cu}_n\text{X}$  ( $\text{X}=\text{Sc}, \text{Y}; n=1-10$ ) clusters calculated with Lanl2dz, cc-pvdz-pp, aug-cc-pvtz, respectively.



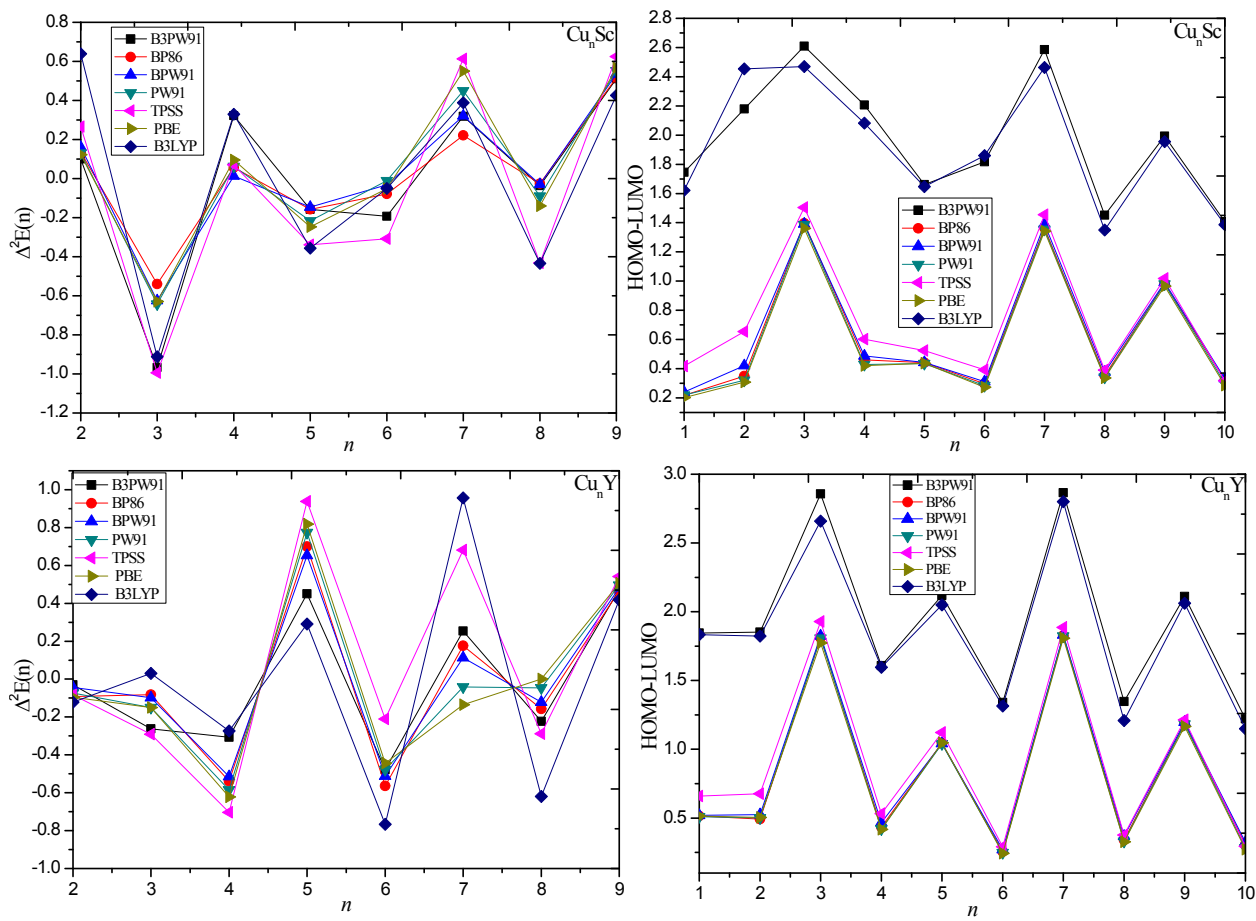

**Figure S2.** Second-order energy differences ( $\Delta_2E$ ) and HOMO-LUMO energy of the  $\text{Cu}_n\text{X}$  ( $\text{X}=\text{Sc}, \text{Y}; n=1-10$ ) clusters based on the different density functionals (B3PW91, BP86, BPW91, PBE, PW91 and TPSS).

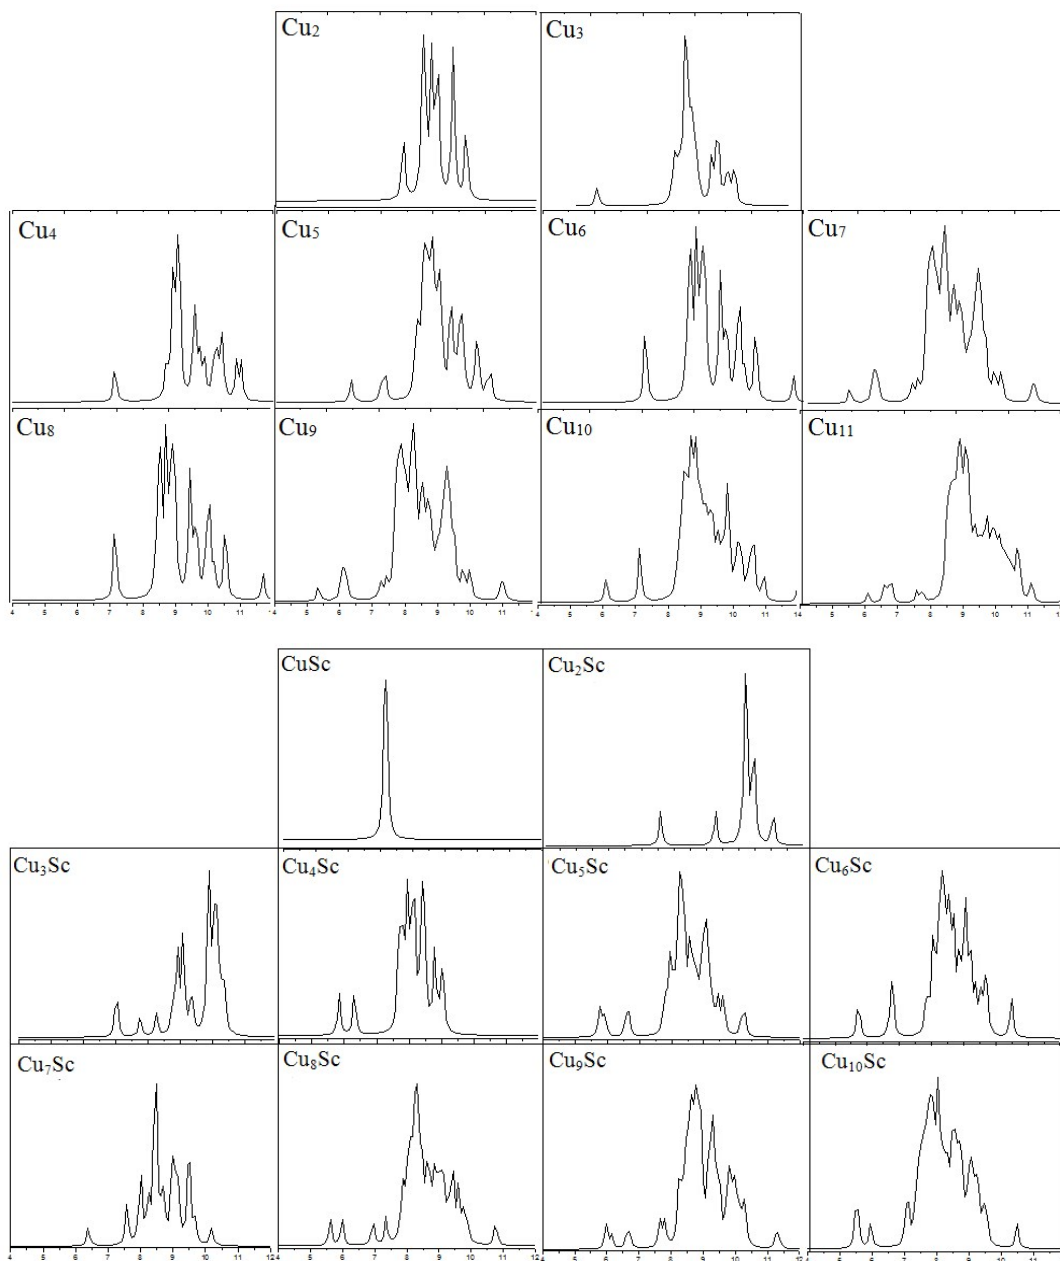

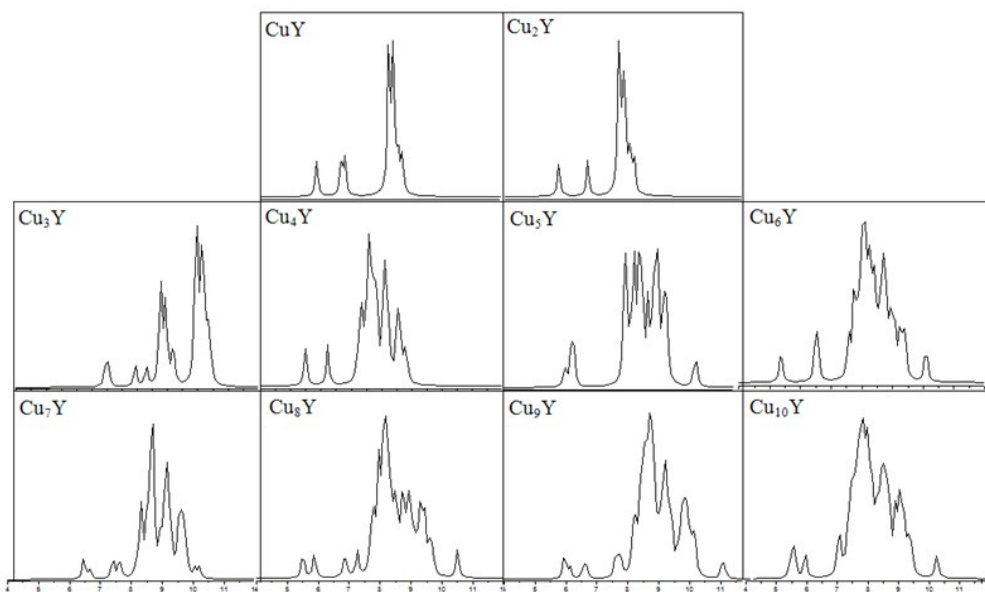

**Figure S3.** Simulated photoelectron spectra of the lowest energy structures  $\text{Cu}_n$  and  $\text{Cu}_n\text{X}$  ( $\text{X}=\text{Sc}$ ,  $\text{Y}$ ;  $n=1-10$ ).
